# Supplementary material for: Implementation of Option B and a fixed-dose combination antiretroviral regimen for prevention of mother-to-child transmission of HIV in South Africa: A model of uptake and adherence to care
Source: PubMed Central journal article supplement (PMC6116946; doi:10.1371/journal.pone.0201955), 2018-08-30
Supplement: pone.0201955.s002.pdf [file pone.0201955.s002.pdf]

**Supplementary Table 1: Predictors of achieving 80% adherence to PMTCT under Model A assumptions (100% pill dispensing)**

| Gestational age at delivery | Variable                   | Category | N          | n (%) with 80% adherence | Unadjusted Risk Ratio (95% CI) | Adjusted Risk Ratio (95% CI) |
|-----------------------------|----------------------------|----------|------------|--------------------------|--------------------------------|------------------------------|
| 36 weeks                    | Age (in years)             | >=28     | 72         | 45.8% (33)               | 1.00 (reference)               | 1.00 (reference)             |
|                             |                            | <28      | 64         | 46.9% (30)               | 1.02 (0.71-1.47)               | 0.92 (0.60-1.41)             |
|                             | Gestational age at booking | <=22     | 69         | 50.7% (35)               | 1.00 (reference)               | 1.00 (reference)             |
|                             |                            | >22      | 56         | 46.4% (26)               | 0.92 (0.64-1.32)               | 0.84 (0.55-1.26)             |
|                             | Parity                     | 0-1      | 77         | 42.9% (33)               | 1.00 (reference)               |                              |
|                             |                            | >1       | 46         | 50.0% (23)               | 1.17 (0.79-1.72)               |                              |
|                             | Married                    | No       | 109        | 45.0% (49)               | 1.00 (reference)               |                              |
|                             |                            | Yes      | 29         | 48.3% (14)               | 1.07 (0.70-1.65)               |                              |
|                             | Employed                   | No       | 96         | 43.8% (42)               | 1.00 (reference)               | 1.00 (reference)             |
|                             |                            | Yes      | 42         | 50.0% (21)               | 1.14 (0.78-1.67)               | 1.22 (0.77-1.94)             |
|                             | CD4 count at booking       | <=350    | 52         | 50.0% (26)               | 1.00 (reference)               | 1.00 (reference)             |
|                             |                            | >350     | 62         | 50.0% (31)               | 1.00 (0.69-1.45)               | 0.97 (0.61-1.53)             |
|                             | Housing type               | Informal | 60         | 45.0% (27)               | 1.00 (reference)               | 1.00 (reference)             |
|                             |                            | Formal   | 78         | 46.2% (36)               | 1.03 (0.71-1.48)               | 0.85 (0.53-1.35)             |
|                             | Walking to clinic          | No       | 32         | 43.8% (14)               | 1.00 (reference)               | 1.00 (reference)             |
|                             |                            | Yes      | 106        | 46.2% (49)               | 1.06 (0.68-1.65)               | 0.86 (0.55-1.35)             |
| Had a prior HIV+ test       | Yes                        | 44       | 36.4% (16) | 1.00 (reference)         | 1.00 (reference)               |                              |
|                             | No                         | 94       | 50.0% (47) | 1.37 (0.89-2.14)         | 1.18 (0.71-1.94)               |                              |
| 38 weeks                    | Age (in years)             | >=28     | 72         | 38.9% (28)               | 1.00 (reference)               | 1.00 (reference)             |
|                             |                            | <28      | 64         | 45.3% (29)               | 1.17 (0.78-1.73)               | 1.20 (0.79-1.82)             |
|                             | Gestational age at booking | <=22     | 69         | 50.7% (35)               | 1.00 (reference)               | 1.00 (reference)             |
|                             |                            | >22      | 56         | 39.3% (22)               | 0.77 (0.52-1.16)               | 0.72 (0.47-1.10)             |
|                             | Parity                     | 0-1      | 77         | 37.7% (29)               | 1.00 (reference)               |                              |
|                             |                            | >1       | 46         | 52.2% (24)               | 1.39 (0.93-2.06)               |                              |
|                             | Married                    | No       | 109        | 40.4% (44)               | 1.00 (reference)               |                              |
|                             |                            | Yes      | 29         | 48.3% (14)               | 1.20 (0.77-1.86)               |                              |
|                             | Employed                   | No       | 96         | 40.6% (39)               | 1.00 (reference)               | 1.00 (reference)             |
|                             |                            | Yes      | 42         | 45.2% (19)               | 1.11 (0.74-1.68)               | 1.06 (0.69-1.63)             |
|                             | CD4 count at booking       | <=350    | 52         | 46.2% (24)               | 1.00 (reference)               | 1.00 (reference)             |
|                             |                            | >350     | 62         | 45.2% (28)               | 0.98 (0.65-1.46)               | 0.98 (0.64-1.51)             |
|                             | Housing type               | Informal | 60         | 40.0% (24)               | 1.00 (reference)               | 1.00 (reference)             |
|                             |                            | Formal   | 78         | 43.6% (34)               | 1.09 (0.73-1.63)               | 1.11 (0.72-1.72)             |
|                             | Walking to clinic          | No       | 32         | 37.5% (12)               | 1.00 (reference)               | 1.00 (reference)             |
|                             |                            | Yes      | 106        | 43.4% (46)               | 1.16 (0.70-1.90)               | 1.08 (0.68-1.72)             |
| Had a prior HIV+ test       | Yes                        | 44       | 29.5% (13) | 1.00 (reference)         | 1.00 (reference)               |                              |
|                             | No                         | 94       | 47.9% (45) | 1.62 (0.98-2.68)         | 1.57 (0.93-2.66)               |                              |
| 40 weeks                    | Age (in years)             | >=28     | 72         | 38.9% (28)               | 1.00 (reference)               | 1.00 (reference)             |
|                             |                            | <28      | 64         | 42.2% (27)               | 1.08 (0.72-1.63)               | 1.05 (0.64-1.72)             |
|                             | Gestational age at booking | <=22     | 69         | 44.9% (31)               | 1.00 (reference)               | 1.00 (reference)             |
|                             |                            | >22      | 56         | 41.1% (23)               | 0.91 (0.61-1.38)               | 0.87 (0.56-1.36)             |
|                             | Parity                     | 0-1      | 77         | 36.4% (28)               | 1.00 (reference)               |                              |

|                            |          |     |            |                  |                  |
|----------------------------|----------|-----|------------|------------------|------------------|
|                            | >1       | 46  | 50.0% (23) | 1.37 (0.91-2.08) |                  |
| Married                    | No       | 109 | 40.4% (44) | 1.00 (reference) |                  |
|                            | Yes      | 29  | 41.4% (12) | 1.03 (0.63-1.67) |                  |
| Employed                   | No       | 96  | 39.6% (38) | 1.00 (reference) | 1.00 (reference) |
|                            | Yes      | 42  | 42.9% (18) | 1.08 (0.71-1.66) | 0.95 (0.56-1.60) |
| CD4 count at booking visit | <=350    | 52  | 44.2% (23) | 1.00 (reference) | 1.00 (reference) |
|                            | >350     | 62  | 45.2% (28) | 1.02 (0.68-1.54) | 1.03 (0.65-1.62) |
| Housing type               | Informal | 60  | 41.7% (25) | 1.00 (reference) | 1.00 (reference) |
|                            | Formal   | 78  | 39.7% (31) | 0.95 (0.64-1.43) | 1.09 (0.63-1.89) |
| Walking to clinic          | No       | 32  | 40.6% (13) | 1.00 (reference) | 1.00 (reference) |
|                            | Yes      | 106 | 40.6% (43) | 1.00 (0.62-1.61) | 0.95 (0.58-1.56) |
| Had a prior HIV+ test      | Yes      | 44  | 29.5% (13) | 1.00 (reference) | 1.00 (reference) |
|                            | No       | 94  | 45.7% (43) | 1.55 (0.93-2.57) | 1.57 (0.86-2.85) |

**Supplementary Table 2: Predictors of achieving 80% adherence to PMTCT under Model B assumptions (90% pill dispensing)**

| Gestational age at delivery | Variable                   | Category | N          | n (%) with 80% adherence | Unadjusted Risk Ratio (95% CI) | Adjusted Risk Ratio (95% CI) |
|-----------------------------|----------------------------|----------|------------|--------------------------|--------------------------------|------------------------------|
| 36 weeks                    | Age (in years)             | >=28     | 72         | 31.9% (23)               | 1.00 (reference)               | 1.00 (reference)             |
|                             |                            | <28      | 64         | 40.6% (26)               | 1.27 (0.81-1.99)               | 1.08 (0.66-1.79)             |
|                             | Gestational age at booking | <=22     | 69         | 33.3% (23)               | 1.00 (reference)               | 1.00 (reference)             |
|                             |                            | >22      | 56         | 42.9% (24)               | 1.29 (0.82-2.02)               | 1.21 (0.74-1.98)             |
|                             | Parity                     | 0-1      | 77         | 32.5% (25)               | 1.00 (reference)               |                              |
|                             |                            | >1       | 46         | 41.3% (19)               | 1.27 (0.79-2.04)               |                              |
|                             | Married                    | No       | 109        | 33.9% (37)               | 1.00 (reference)               |                              |
|                             |                            | Yes      | 29         | 41.4% (12)               | 1.22 (0.73-2.02)               |                              |
|                             | Employed                   | No       | 96         | 34.4% (33)               | 1.00 (reference)               | 1.00 (reference)             |
|                             |                            | Yes      | 42         | 38.1% (16)               | 1.11 (0.69-1.78)               | 1.20 (0.72-1.99)             |
|                             | CD4 count at booking       | <=350    | 52         | 34.6% (18)               | 1.00 (reference)               | 1.00 (reference)             |
|                             |                            | >350     | 62         | 41.9% (26)               | 1.21 (0.75-1.95)               | 1.06 (0.62-1.81)             |
|                             | Housing type               | Informal | 60         | 36.7% (22)               | 1.00 (reference)               | 1.00 (reference)             |
|                             |                            | Formal   | 78         | 34.6% (27)               | 0.94 (0.60-1.48)               | 0.89 (0.53-1.49)             |
|                             | Walking to clinic          | No       | 32         | 40.6% (13)               | 1.00 (reference)               | 1.00 (reference)             |
|                             |                            | Yes      | 106        | 34.0% (36)               | 0.84 (0.51-1.37)               | 0.60 (0.35-1.02)             |
| Had a prior HIV+ test       | Yes                        | 44       | 29.5% (13) | 1.00 (reference)         | 1.00 (reference)               |                              |
|                             | No                         | 94       | 38.3% (36) | 1.30 (0.77-2.19)         | 1.03 (0.59-1.81)               |                              |
| 38 weeks                    | Age (in years)             | >=28     | 72         | 27.8% (20)               | 1.00 (reference)               | 1.00 (reference)             |
|                             |                            | <28      | 64         | 35.9% (23)               | 1.29 (0.79-2.12)               | 1.53 (0.82-2.84)             |
|                             | Gestational age at booking | <=22     | 69         | 31.9% (22)               | 1.00 (reference)               | 1.00 (reference)             |
|                             |                            | >22      | 56         | 37.5% (21)               | 1.18 (0.73-1.91)               | 1.38 (0.74-2.59)             |
|                             | Parity                     | 0-1      | 77         | 29.9% (23)               | 1.00 (reference)               |                              |
|                             |                            | >1       | 46         | 39.1% (18)               | 1.31 (0.80-2.15)               |                              |
|                             | Married                    | No       | 109        | 31.2% (34)               | 1.00 (reference)               |                              |
|                             |                            | Yes      | 29         | 34.5% (10)               | 1.11 (0.62-1.96)               |                              |
|                             | Employed                   | No       | 96         | 31.3% (30)               | 1.00 (reference)               | 1.00 (reference)             |
|                             |                            | Yes      | 42         | 33.3% (14)               | 1.07 (0.63-1.80)               | 1.05 (0.54-2.02)             |
|                             | CD4 count at booking       | <=350    | 52         | 34.6% (18)               | 1.00 (reference)               | 1.00 (reference)             |
|                             |                            | >350     | 62         | 33.9% (21)               | 0.98 (0.59-1.63)               | 0.96 (0.54-1.70)             |
|                             | Housing type               | Informal | 60         | 31.7% (19)               | 1.00 (reference)               | 1.00 (reference)             |
|                             |                            | Formal   | 78         | 32.1% (25)               | 1.01 (0.62-1.66)               | 1.34 (0.71-2.54)             |
|                             | Walking to clinic          | No       | 32         | 31.3% (10)               | 1.00 (reference)               | 1.00 (reference)             |
|                             |                            | Yes      | 106        | 32.1% (34)               | 1.03 (0.57-1.84)               | 0.77 (0.41-1.48)             |
| Had a prior HIV+ test       | Yes                        | 44       | 22.7% (10) | 1.00 (reference)         | 1.00 (reference)               |                              |
|                             | No                         | 94       | 36.2% (34) | 1.59 (0.87-2.92)         | 1.51 (0.73-3.11)               |                              |
| 40 weeks                    | Age (in years)             | >=28     | 72         | 27.8% (20)               | 1.00 (reference)               | 1.00 (reference)             |
|                             |                            | <28      | 64         | 35.9% (23)               | 1.29 (0.79-2.12)               | 1.32 (0.71-2.43)             |
|                             | Gestational age at booking | <=22     | 69         | 29.0% (20)               | 1.00 (reference)               | 1.00 (reference)             |
|                             |                            | >22      | 56         | 39.3% (22)               | 1.36 (0.83-2.22)               | 1.44 (0.78-2.65)             |
|                             | Parity                     | 0-1      | 77         | 28.6% (22)               | 1.00 (reference)               |                              |

|                            |          |     |            |                  |                  |
|----------------------------|----------|-----|------------|------------------|------------------|
|                            | >1       | 46  | 39.1% (18) | 1.37 (0.83-2.27) |                  |
| Married                    | No       | 109 | 31.2% (34) | 1.00 (reference) |                  |
|                            | Yes      | 29  | 34.5% (10) | 1.11 (0.62-1.96) |                  |
| Employed                   | No       | 96  | 32.3% (31) | 1.00 (reference) | 1.00 (reference) |
|                            | Yes      | 42  | 31.0% (13) | 0.96 (0.56-1.64) | 0.97 (0.51-1.87) |
| CD4 count at booking visit | <=350    | 52  | 32.7% (17) | 1.00 (reference) | 1.00 (reference) |
|                            | >350     | 62  | 37.1% (23) | 1.13 (0.68-1.88) | 0.99 (0.56-1.77) |
| Housing type               | Informal | 60  | 33.3% (20) | 1.00 (reference) | 1.00 (reference) |
|                            | Formal   | 78  | 30.8% (24) | 0.92 (0.57-1.50) | 1.06 (0.55-2.02) |
| Walking to clinic          | No       | 32  | 34.4% (11) | 1.00 (reference) | 1.00 (reference) |
|                            | Yes      | 106 | 31.1% (33) | 0.91 (0.52-1.58) | 0.72 (0.39-1.34) |
| Had a prior HIV+ test      | Yes      | 44  | 27.3% (12) | 1.00 (reference) | 1.00 (reference) |
|                            | No       | 94  | 34.0% (32) | 1.25 (0.71-2.18) | 1.13 (0.57-2.27) |

**Supplementary Table 3: Predictors of achieving 80% adherence to PMTCT under Model C assumptions (80% pill dispensing)**

| Gestational age at delivery | Variable                   | Category | N          | n (%) with 80% adherence | Unadjusted Risk Ratio (95% CI) | Adjusted Risk Ratio (95% CI) |
|-----------------------------|----------------------------|----------|------------|--------------------------|--------------------------------|------------------------------|
| 36 weeks                    | Age (in years)             | >=28     | 72         | 26.4% (19)               | 1.00 (reference)               | 1.00 (reference)             |
|                             |                            | <28      | 64         | 23.4% (15)               | 0.89 (0.49-1.60)               | 0.63 (0.31-1.29)             |
|                             | Gestational age at booking | <=22     | 69         | 29.0% (20)               | 1.00 (reference)               | 1.00 (reference)             |
|                             |                            | >22      | 56         | 21.4% (12)               | 0.74 (0.40-1.38)               | 0.52 (0.25-1.06)             |
|                             | Parity                     | 0-1      | 77         | 23.4% (18)               | 1.00 (reference)               |                              |
|                             |                            | >1       | 46         | 26.1% (12)               | 1.12 (0.59-2.10)               |                              |
|                             | Married                    | No       | 109        | 24.8% (27)               | 1.00 (reference)               |                              |
|                             |                            | Yes      | 29         | 24.1% (7)                | 0.97 (0.47-2.01)               |                              |
|                             | Employed                   | No       | 96         | 20.8% (20)               | 1.00 (reference)               | 1.00 (reference)             |
|                             |                            | Yes      | 42         | 33.3% (14)               | 1.60 (0.90-2.85)               | 1.47 (0.76-2.86)             |
|                             | CD4 count at booking       | <=350    | 52         | 23.1% (12)               | 1.00 (reference)               | 1.00 (reference)             |
|                             |                            | >350     | 62         | 29.0% (18)               | 1.26 (0.67-2.36)               | 1.45 (0.66-3.16)             |
|                             | Housing type               | Informal | 60         | 21.7% (13)               | 1.00 (reference)               | 1.00 (reference)             |
|                             |                            | Formal   | 78         | 26.9% (21)               | 1.24 (0.68-2.27)               | 1.26 (0.59-2.71)             |
|                             | Walking to clinic          | No       | 32         | 21.9% (7)                | 1.00 (reference)               | 1.00 (reference)             |
|                             |                            | Yes      | 106        | 25.5% (27)               | 1.16 (0.56-2.42)               | 1.08 (0.48-2.44)             |
| Had a prior HIV+ test       | Yes                        | 44       | 22.7% (10) | 1.00 (reference)         | 1.00 (reference)               |                              |
|                             | No                         | 94       | 25.5% (24) | 1.12 (0.59-2.14)         | 0.85 (0.41-1.78)               |                              |
| 38 weeks                    | Age (in years)             | >=28     | 72         | 20.8% (15)               | 1.00 (reference)               | 1.00 (reference)             |
|                             |                            | <28      | 64         | 21.9% (14)               | 1.05 (0.55-2.00)               | 1.22 (0.59-2.51)             |
|                             | Gestational age at booking | <=22     | 69         | 26.1% (18)               | 1.00 (reference)               | 1.00 (reference)             |
|                             |                            | >22      | 56         | 17.9% (10)               | 0.68 (0.34-1.36)               | 0.43 (0.20-0.94)             |
|                             | Parity                     | 0-1      | 77         | 20.8% (16)               | 1.00 (reference)               |                              |
|                             |                            | >1       | 46         | 23.9% (11)               | 1.15 (0.59-2.26)               |                              |
|                             | Married                    | No       | 109        | 21.1% (23)               | 1.00 (reference)               |                              |
|                             |                            | Yes      | 29         | 20.7% (6)                | 0.98 (0.44-2.18)               |                              |
|                             | Employed                   | No       | 96         | 16.7% (16)               | 1.00 (reference)               | 1.00 (reference)             |
|                             |                            | Yes      | 42         | 31.0% (13)               | 1.86 (0.98-3.51)               | 1.48 (0.71-3.10)             |
|                             | CD4 count at booking       | <=350    | 52         | 21.2% (11)               | 1.00 (reference)               | 1.00 (reference)             |
|                             |                            | >350     | 62         | 24.2% (15)               | 1.14 (0.58-2.27)               | 1.37 (0.65-2.88)             |
|                             | Housing type               | Informal | 60         | 16.7% (10)               | 1.00 (reference)               | 1.00 (reference)             |
|                             |                            | Formal   | 78         | 24.4% (19)               | 1.46 (0.73-2.91)               | 2.01 (0.90-4.47)             |
|                             | Walking to clinic          | No       | 32         | 12.5% (4)                | 1.00 (reference)               | 1.00 (reference)             |
|                             |                            | Yes      | 106        | 23.6% (25)               | 1.89 (0.71-5.02)               | 1.98 (0.77-5.08)             |
| Had a prior HIV+ test       | Yes                        | 44       | 18.2% (8)  | 1.00 (reference)         | 1.00 (reference)               |                              |
|                             | No                         | 94       | 22.3% (21) | 1.23 (0.59-2.55)         | 1.07 (0.47-2.40)               |                              |
| 40 weeks                    | Age (in years)             | >=28     | 72         | 18.1% (13)               | 1.00 (reference)               | 1.00 (reference)             |
|                             |                            | <28      | 64         | 21.9% (14)               | 1.21 (0.62-2.38)               | 1.08 (0.50-2.31)             |
|                             | Gestational age at booking | <=22     | 69         | 21.7% (15)               | 1.00 (reference)               | 1.00 (reference)             |
|                             |                            | >22      | 56         | 17.9% (10)               | 0.82 (0.40-1.68)               | 0.62 (0.28-1.37)             |
|                             | Parity                     | 0-1      | 77         | 18.2% (14)               | 1.00 (reference)               |                              |

|                            |          |     |            |                  |                  |
|----------------------------|----------|-----|------------|------------------|------------------|
|                            | >1       | 46  | 21.7% (10) | 1.20 (0.58-2.47) |                  |
| Married                    | No       | 109 | 21.1% (23) | 1.00 (reference) |                  |
|                            | Yes      | 29  | 13.8% (4)  | 0.65 (0.25-1.74) |                  |
| Employed                   | No       | 96  | 16.7% (16) | 1.00 (reference) | 1.00 (reference) |
|                            | Yes      | 42  | 26.2% (11) | 1.57 (0.80-3.09) | 1.18 (0.54-2.62) |
| CD4 count at booking visit | <=350    | 52  | 19.2% (10) | 1.00 (reference) | 1.00 (reference) |
|                            | >350     | 62  | 24.2% (15) | 1.26 (0.62-2.56) | 1.18 (0.53-2.60) |
| Housing type               | Informal | 60  | 16.7% (10) | 1.00 (reference) | 1.00 (reference) |
|                            | Formal   | 78  | 21.8% (17) | 1.31 (0.65-2.65) | 1.43 (0.63-3.25) |
| Walking to clinic          | No       | 32  | 12.5% (4)  | 1.00 (reference) | 1.00 (reference) |
|                            | Yes      | 106 | 21.7% (23) | 1.74 (0.65-4.65) | 2.35 (0.75-7.34) |
| Had a prior HIV+ test      | Yes      | 44  | 15.9% (7)  | 1.00 (reference) | 1.00 (reference) |
|                            | No       | 94  | 21.3% (20) | 1.34 (0.61-2.93) | 1.22 (0.52-2.86) |
